# Supplementary material
Source: publisher figshare collection journal article supplement (https://tandf.figshare.com/ndownloader/files/22819385)
Supplement: Supplementary file 1 [file 22819385]

Cases where contribution to death was changed

| Age | Original RCF | Final RCF | Agent | Error description |
| --- | --- | --- | --- | --- |
| 47 years | Probably not responsible | Contributory | Insulin; dextrose | Put on insulin drip with resultant hypoglycemia (30 mg/dL) and hypotension at that time. Bedside readings of glucose were low, but confirmatory levels after 23 x ampules of D50W and a D20 infusion at 250 cc/hr were > 800 and > 3300 mg/dL. |
| 58 years | Unknown contribution | Contributory | Gadolinium isotope | Patient received gadolinium imaging through ventriculostomy with resultant status epilepticus. |
| 68 years | Unknown contribution | Contributory | Naltrexone | Patient on fentanyl infusion for 3 days received 50 mg naltrexone orally rather than 50 mg naloxone orally. Precipitated opioid withdrawal. |
| 68 years | Unknown contribution | Contributory | Digoxin | ESRD patient, digoxin level 5.2 after recent discharge, presented with hypotension. |
| 83 years | Unknown contribution | Contributory | Lidocaine | Patient received 6400 mg (160 mL of 4%) lidocaine during bronchoscopy. Experienced seizure and cardiac arrest. |
| 56 years | Clearly responsible | Contributory | Thiosulfate | Patient received incorrect route of thiosulfate for cyanide poisoning after being pulled from a house fire in cardiac arrest. Likely died from exposures due to house fire, not thiosulfate error. |

RCF, relative contribution to fatality

Cases where more than one substance were coded

| Drug 1 | | | | | | Drug 2 | | | | | | |
| --- | --- | --- | --- | --- | --- | --- | --- | --- | --- | --- | --- | --- |
| CO2 | | | | | | Nitrous oxide | | | | | | |
| Nifedipine | | | | | | Beta-blocker | | | | | | |
| Phenytoin | | | | | | Warfarin | | | | | | |
| Gemfibrozil | | | | | | Cerivastatin | | | | | | |
| Metoprolol | | | | | | Diltiazem | | | | | | |
| Morphine | | | | | | Promethazine | | | | | | |
| Nalbuphine | | | | | | Methadone | | | | | | |
| Bupivacaine | | | | | | Lidocaine | | | | | | |
| Diltiazem | | | | | | Diltiazem | | | | | | |
| Phenytoin | | | | | | Activated charcoal | | | | | | |
| Total parenteral nutrition | | | | | | Parenteral amino acids | | | | | | |
| Diazepam | | | | | | Phentermine | | | | | | |
| Verapamil | | | | | | Atenolol | | | | | | |
| Lidocaine | | | | | | Activated charcoal | | | | | | |
| Lidocaine | | | | | | Bupivacaine | | | | | | |
| Phosphenytoin | | | | | | Lorazepam | | | | | | |
| Timolol | | | | | | Metoprolol | | | | | | |
| Amlodipine | | | | | | Carvedilol | | | | | | |
| Haloperidol | | | | | | Ethanol | | | | | | |
| Lidocaine | | | | | | Benzalkonium chloride | | | | | | |
| Enoxaparin | | | | | | Fondaparinux | | | | | | |
| Meperidine | | | | | | Hydromorphone | | | | | | |
| Bupivacaine | | | | | | Hydromorphone | | | | | | |
|  | | | | | | | | | | | | | |
| Drug 1 | | | | Drug 2 | | | | | Drug 3 | | | | |
| Clozapine | | | | Morphine | | | | | Lorazepam | | | | |
| Fentanyl | | | | Hydromorphone | | | | | Diphenhydramine | | | | |
| Midazolam | | | | Heroin | | | | | Phenobarbital | | | | |
| Carvedilol | | | | Lisinopril | | | | | Furosemide | | | | |
| Amlodipine | | | | Amiodarone | | | | | Metoprolol | | | | |
| Activated charcoal | | | | Acetaminophen | | | | | Ethanol | | | | |
| Acetylcysteine | | | | Oxycodone/acetaminophen | | | | | Alprazolam | | | | |
| Lithium | | | | Fentanyl | | | | | Valproic acid | | | | |
| Fentanyl | | | | Diazepam | | | | | Gabapentin | | | | |
| Linezolid | | | | Fluoxetine | | | | | Duloxetine | | | | |
|  | | | | | | | | | | | | | |
| Drug 1 | | Drug 2 | | | Drug 3 | | | | | Drug 4 | | | |
| Florastor | | Phoslo | | | Unk otc | | | | | Antibiotic | | | |
|  | | | | | | | | | | | | | |
| Drug 1 | Diltiazem | | | | | | Drug 1 | | | | Diltiazem | | |
| Drug 2 | Diltiazem | | | | | | Drug 2 | | | | Atenolol | | |
| Drug 3 | Diltiazem | | | | | | Drug 3 | | | | Rosiglitazone | | |
| Drug 4 | Carvedilol | | | | | | Drug 4 | | | | Clopidogrel | | |
| Drug 5 | Nitroglycerin | | | | | | Drug 5 | | | | Hydrochlorothiazide | | |
|  |  | | | | | | Drug 6 | | | | Levothyroxine | | |
|  | | | | | | | | | | | | | |
| Drug 1 | | | topiramate | | | | | Drug 1 | | | | diltiazem | |
| Drug 2 | | | valproic acid | | | | | Drug 2 | | | | carvedilol | |
| Drug 3 | | | carbamazepine | | | | | Drug 3 | | | | metoprolol | |
| Drug 4 | | | benztropine | | | | | Drug 4 | | | | nifedipine | |
| Drug 5 | | | risperidone | | | | | Drug 5 | | | | hydralazine | |
| Drug 6 | | | IBUPROFEN | | | | | Drug 6 | | | | Isosorbide Mononitrate | |
| Drug 7 | | | Unknown H2 blocker | | | | | Drug 7 | | | | clonidine | |
|  | | |  | | | | | Drug 8 | | | | terazosin | |
|  | | |  | | | | | Drug 9 | | | | clorazepate | |

Drug numbers are substance rank order according to submission to the National Poison Data System
